# Supplementary material
Source: PubMed Central journal article supplement (PMC10750911)
Supplement: NIHPP2023.03.16.532307V3-supplement-1.pdf [file NIHPP2023.03.16.532307V3-supplement-1.pdf]

$$\begin{aligned}
 P(h_t | Y_t) &\propto P(Y_t | h_t)P(h_t) \propto P(Y_t | h_t) \\
 &\propto \exp \left[ \sum_k \frac{(Y_{t,k} - v_t)^\top R(h_t) \Gamma(Cx_t + d)_k}{s_{t,k} \sigma_k^2} \right] \\
 &= \exp \left[ \frac{\text{tr} [R(h_t) \Gamma(Cx_t + d)_k (Y_{t,k} - v_t)^\top]}{s_{t,k} \sigma_k^2} \right] \\
 &\propto \exp \text{tr} [R(h_t) S] \quad \text{where } S = \sum_k \Gamma(Cx_t + d)_k (Y_{t,k} - v_t)^\top / (s_{t,k} \sigma_k^2) \\
 &\propto \exp [\cos(h_t)(S_{1,1} + S_{2,2}) + \sin(h_t)(S_{1,2} - S_{2,1})]
 \end{aligned}$$

Let  $[\kappa \cos(\theta), \kappa \sin(\theta)]$  represent  $[S_{1,1} + S_{2,2}, S_{1,2} - S_{2,1}]$  in polar coordinates. Then

$$\begin{aligned}
 P(Y_t | h_t) &\propto \exp[\kappa \cos(h_t) \cos(\theta) + \sin(h_t) \sin(\theta)] \\
 &= \exp[\kappa \cos(h_t - \theta)] \propto \text{vM}(h_t | \theta, \kappa)
 \end{aligned}$$

## Supplemental References

- 1 Markowitz, J. E. *et al.* Spontaneous behaviour is structured by reinforcement without explicit reward. *Nature* **614**, 108-117 (2023). <https://doi.org/10.1038/s41586-022-05611-2>
- 2 Lin, S. *et al.* Characterizing the structure of mouse behavior using Motion Sequencing. (2022). <https://doi.org/10.48550/ARXIV.2211.08497>
- 3 Zhou, Z., Rahman Siddiquee, M. M., Tajbakhsh, N. & Liang, J. in *Deep Learning in Medical Image Analysis and Multimodal Learning for Clinical Decision Support*. (eds Danail Stoyanov *et al.*) 3-11 (Springer International Publishing).
- 4 Sun, K., Xiao, B., Liu, D. & Wang, J. in *2019 IEEE/CVF Conference on Computer Vision and Pattern Recognition (CVPR)*. 5686-5696.
- 5 Zhang, L., Dunn, T., Marshall, J., Olveczky, B. & Linderman, S. in *Proceedings of The 24th International Conference on Artificial Intelligence and Statistics* Vol. 130 (eds Banerjee Arindam & Fukumizu Kenji) 2800--2808 (PMLR, Proceedings of Machine Learning Research, 2021).
- 6 Nath, T. *et al.* Using DeepLabCut for 3D markerless pose estimation across species and behaviors. *Nature Protocols* **14**, 2152-2176 (2019). <https://doi.org/10.1038/s41596-019-0176-0>
- 7 Wiltschko, A. B. *et al.* Mapping Sub-Second Structure in Mouse Behavior. *Neuron* **88**, 1121-1135 (2015). <https://doi.org/10.1016/j.neuron.2015.11.031>
- 8 Hsu, A. I. & Yttri, E. A. B-SOid, an open-source unsupervised algorithm for identification and fast prediction of behaviors. *Nature Communications* **12**, 5188 (2021). <https://doi.org/10.1038/s41467-021-25420-x> PMID - 34465784

- 9 Luxem, K. *et al.* Identifying behavioral structure from deep variational embeddings of animal motion. *Commun Biol* **5**, 1267 (2022). <https://doi.org/10.1038/s42003-022-04080-7>
- 10 Berman, G. J., Choi, D. M., Bialek, W. & Shaevitz, J. W. Mapping the stereotyped behaviour of freely moving fruit flies. *Journal of the Royal Society, Interface / the Royal Society* **11** (2014). <https://doi.org/papers3://publication/doi/10.1098/rsif.2014.0672>
- 11 Bohoslav, J. P. *et al.* DeepEthogram, a machine learning pipeline for supervised behavior classification from raw pixels. *eLife* **10**, e63377 (2021). <https://doi.org/10.7554/eLife.63377>
- 12 Sun, J. J. *et al.* Caltech Mouse Social Interactions (CalMS21) Dataset. (2021). <https://doi.org/10.22002/D1.1991>
- 13 Ackerson, G. & Fu, K. On state estimation in switching environments. *IEEE Transactions on Automatic Control* **15**, 10-17 (1970). <https://doi.org/10.1109/TAC.1970.1099359>
- 14 Fox, E. B., Sudderth, E. B., Jordan, M. I. & Willsky, A. S. in *Proceedings of the 25th International Conference on Machine Learning* 312–319 (Association for Computing Machinery, 2008).
- 15 Andreella, A. & Finos, L. Procrustes Analysis for High-Dimensional Data. *Psychometrika* **87**, 1422-1438 (2022). <https://doi.org/10.1007/s11336-022-09859-5>
